# Supplementary material
Source: PubMed Central journal article supplement (PMC2832748)
Supplement: NIHMS177464-supplement-01.pdf [file NIHMS177464-supplement-01.pdf]

**Supplementary Table 1**  
**Time and MOI for optimization of rubella-specific cytokine secretion**

| <b>Time→</b> | <b>12</b>    | <b>24</b>    | <b>2</b>    | <b>3</b>    | <b>4</b>    | <b>5</b>    | <b>6</b>    | <b>7</b>    | <b>8</b>    |
|--------------|--------------|--------------|-------------|-------------|-------------|-------------|-------------|-------------|-------------|
| <b>MOI ↓</b> | <b>hours</b> | <b>hours</b> | <b>days</b> |
| <b>0.05</b>  |              | x            |             |             | x           | x           |             |             | x           |
| <b>0.1</b>   | x            |              |             |             | x           |             |             |             | x           |
| <b>0.5</b>   |              | x            |             | x           |             | x           |             | x           |             |
| <b>1.0</b>   |              |              | x           |             |             |             | x           |             |             |
| <b>5.0</b>   |              | x            |             |             | x           | x           |             |             | x           |
