# Supplementary material
Source: PubMed Central journal article supplement (PMC2832748)
Supplement: NIHMS177464-supplement-02.pdf [file NIHMS177464-supplement-02.pdf]

**Supplementary Table 2****Culture conditions that maximize rubella-specific cytokine secretion**

| <b>Cytokine</b> | <b>Predicted Value</b> | <b>Standard Error</b> | <b>Optimal Time in hours</b> | <b>Optimal MOI</b> | <b>Range of Time in hours</b> | <b>Range of MOI</b> |
|-----------------|------------------------|-----------------------|------------------------------|--------------------|-------------------------------|---------------------|
| IL-2            | 5.3                    | 1.1                   | 154                          | 5.0                | 60-186                        | 3.5-5.0             |
| IL-4            | 4.0                    | 2.0                   | 12                           | 4.3                | 12-24                         | 0.1-5.0             |
| IL-5            | 2.5                    | 1.3                   | 12                           | 1.3                | 12-60                         | 0.05-5.0            |
| IL-6            | 81.8                   | 22.2                  | 17                           | 5.0                | 12-72                         | 1.5-5.0             |
| IL-10           | 4.7                    | 1.5                   | 27                           | 5.0                | 12-108                        | 0.5-5               |
| IL-12p40        | 3.3                    | 1.3                   | 12                           | 5.0                | 12-24                         | 2.0-5.0             |
| TNF- $\alpha$   | 5.5                    | 2.7                   | 192                          | 0.05               | 138-192                       | 0.05-0.1            |
| IFN- $\gamma$   | 2.1                    | 1.0                   | 57                           | 5.0                | 30-102                        | 0.05-5.0            |
| GM-CSF          | 21.8                   | 3.7                   | 12                           | 5.0                | 12-18                         | 3.0-5.0             |
