# Supplementary material
Source: PubMed Central journal article supplement (PMC2832748)
Supplement: NIHMS177464-supplement-03.pdf [file NIHMS177464-supplement-03.pdf]

**Supplementary Table 3****Culture conditions used for detection of rubella-specific cytokines in the study**

| <b>Cytokine</b>         | <b>Rubella MOI</b> | <b>Length in culture</b> |
|-------------------------|--------------------|--------------------------|
| IL-12p40, GM-CSF        | 5                  | 18 hours                 |
| IL-4, IL-5, IL-6, IL-10 | 5                  | 24 hours                 |
| IFN- $\gamma$           | 5                  | 2 days                   |
| TNF- $\alpha$           | 0.05               | 8 days                   |
| IL-2                    | 5                  | 8 days                   |
